# Supplementary material for: Hepatic overexpression of methionine sulfoxide reductase A reduces atherosclerosis in apolipoprotein E-deficient mice
Source: PubMed Central journal article supplement (PMC4583078; doi:10.1194/jlr.m058776), 2015-10
Supplement: supp_M058776_jlr.M058776-1.pdf [file supp_M058776_jlr.M058776-1.pdf]

## Supplemental Data 1

**Supplemental Table 1. Oligonucleotide primers and PCR conditions of mice genes used for quantitative real-time PCR**

| Genes   | Forward primer           | Reverse primer             | Product (bp) | Annealing (°C) |
|---------|--------------------------|----------------------------|--------------|----------------|
| 18S     | CGCGGTTCTATTTTGTGGT      | AGTCGGCATCGTTTATGGTC       | 219          | 60             |
| ApoAI   | CTCCTCCTTGGGCCAACA       | TGACTAACGGTTGAACCCAGAGT    | 72           | 58             |
| LDLR    | TGTGAAAATGACTCAGACGAAC   | GGAGATGCACTTGCCATCCT       | 87           | 58             |
| SR-BI   | TTTCAGCAGGATCCATCTGGTGGA | AGTTCATGGGGATCCCAGTGAC     | 470          | 60             |
| LXRa    | CTCAATGCCTGATGTTTCTCCT   | TCCAACCCTATCCCTAAAGCAA     | 150          | 60             |
| ABCA1   | GGAGCTGGGAAGTCAACAAC     | ACATGCTCTCTTCCCGTCAG       | 176          | 60             |
| ABCG8   | ACAAGGCTCACACAGATCTCTCA  | TATAATTGGTTCCCATTCCTACTG   | 212          | 56.6           |
| ACAT    | CGCTGCGTGCTGGTCTTT       | ATGCCCTTTCCTCCTCTGACA      | 104          | 56.6           |
| CYP7A1  | AAACTCCCTGTCATACCACAAAG  | TTCCATCACTTGGGTCTATGC      | 120          | 61.7           |
| CYP27A1 | GACAACCTCCTTTGTGATTG     | GTGGTCTCTTATTGGGTACTIONTGC | 166          | 61.7           |
| ACCa    | CGCTCAGGTCACCAAAAAGAAT   | GTCCCGGCCACATAACTGAT       | 64           | 60             |
| FASN    | CCTGGATAGCATTCCGAACCT    | AGCACATCTCGAAGGCTACACA     | 122          | 60             |
| PON I   | TGGTGGTAAACCATCCAGACTC   | TGTGATGGTTTTTCAGATGCAAG    | 92           | 60             |
| IL-6    | AGTTGCCTTCTTGGGACTGA     | TCCACGATTTCCCAGAGAAC       | 159          | 60             |
| TNFa    | CGTCAGCCGATTTGCTATCT     | CGGACTCCGCAAAGTCTAAG       | 206          | 60             |

**Supplemental Table 2. The information of all primary antibodies and loading amount of proteins for Western blot**

| <b>Primary antibody</b>     | <b>Origin</b> | <b>Company</b>           | <b>Cat. No.</b> | <b>Sample loading</b> |
|-----------------------------|---------------|--------------------------|-----------------|-----------------------|
| MsrA polyclonal antibody    | USA           | Abcam                    | Ab16803         | 25 ug-50 µg           |
| ApoAI polyclonal antibody   | USA           | Abcam                    | Ab7614          | 50 µg                 |
| LDLR polyclonal antibody    | USA           | Abcam                    | Ab170478        | 70 µg                 |
| SRBI polyclonal antibody    | USA           | Novus Biologicals        | NB400-104       | 15 µg                 |
| LXRa polyclonal antibody    | USA           | Abcam                    | Ab28478         | 50 µg                 |
| ABCA1 monoclonal antibody   | USA           | Abcam                    | Ab18180         | 50 µg                 |
| ABCG8 monoclonal antibody   | USA           | Novus Biologicals        | NBP1-71706      | 50 µg                 |
| ACAT polyclonal antibody    | USA           | Abcam                    | Ab93477         | 50 µg                 |
| CEH polyclonal antibody     | USA           | Abcam                    | Ab111544        | 50 µg                 |
| PON1 monoclonal antibody    | USA           | Abcam                    | Ab24261         | 50 µg                 |
| SAA monoclonal antibody     | USA           | Santa Cruz Biotechnology | SC-59680        | 1 µL(serum)           |
| GAPDH polyclonal antibody   | USA           | Santa Cruz Biotechnology | SC-25778        |                       |
| β-actin monoclonal antibody | USA           | Santa Cruz Biotechnology | SC-47778        |                       |
